# Supplementary material for: Facile Synthesis of Nd2Fe14B Hard Magnetic Particles with Microwave-Assisted Hydrothermal Method
Source: MDPI journal article supplement (doi:10.3390/molecules28237918), 2023-12-03
Supplement: s1 [file s1]

**Supplementary Material for:**

**Facile Synthesis of Nd<sub>2</sub>Fe<sub>14</sub>B Hard Magnetic Particles with**

**Microwave-Assisted Hydrothermal Method**

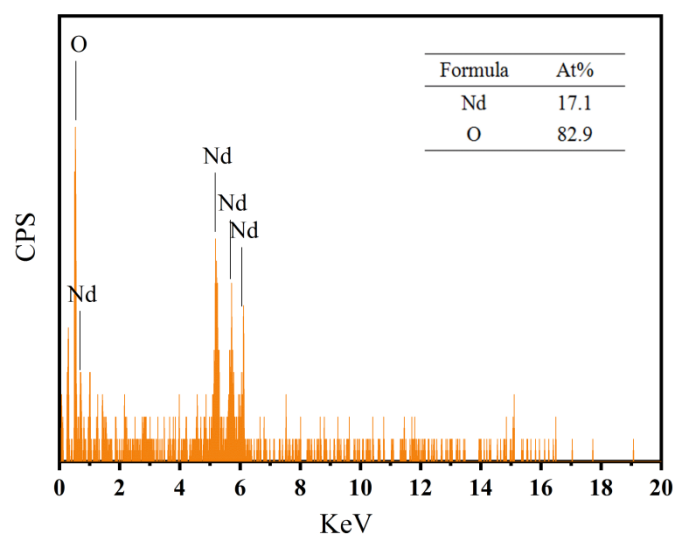

Figure S1. EDS scans of selected points marked #1 in Figure 2.

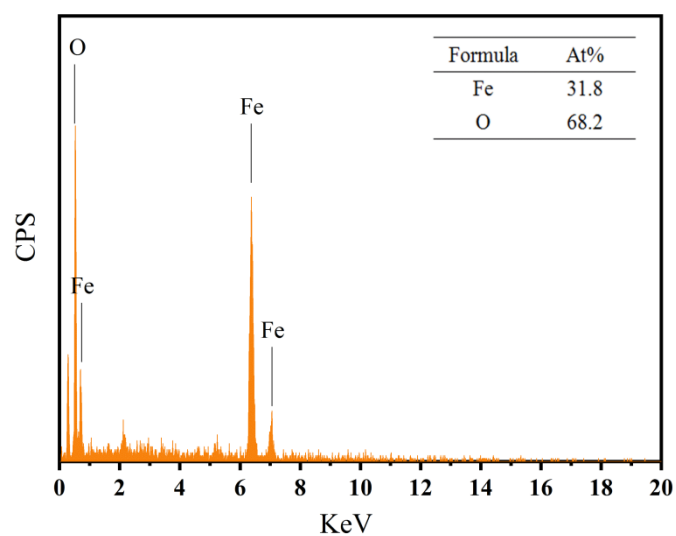

Figure S2. EDS scans of selected points marked #2 in Figure 2.

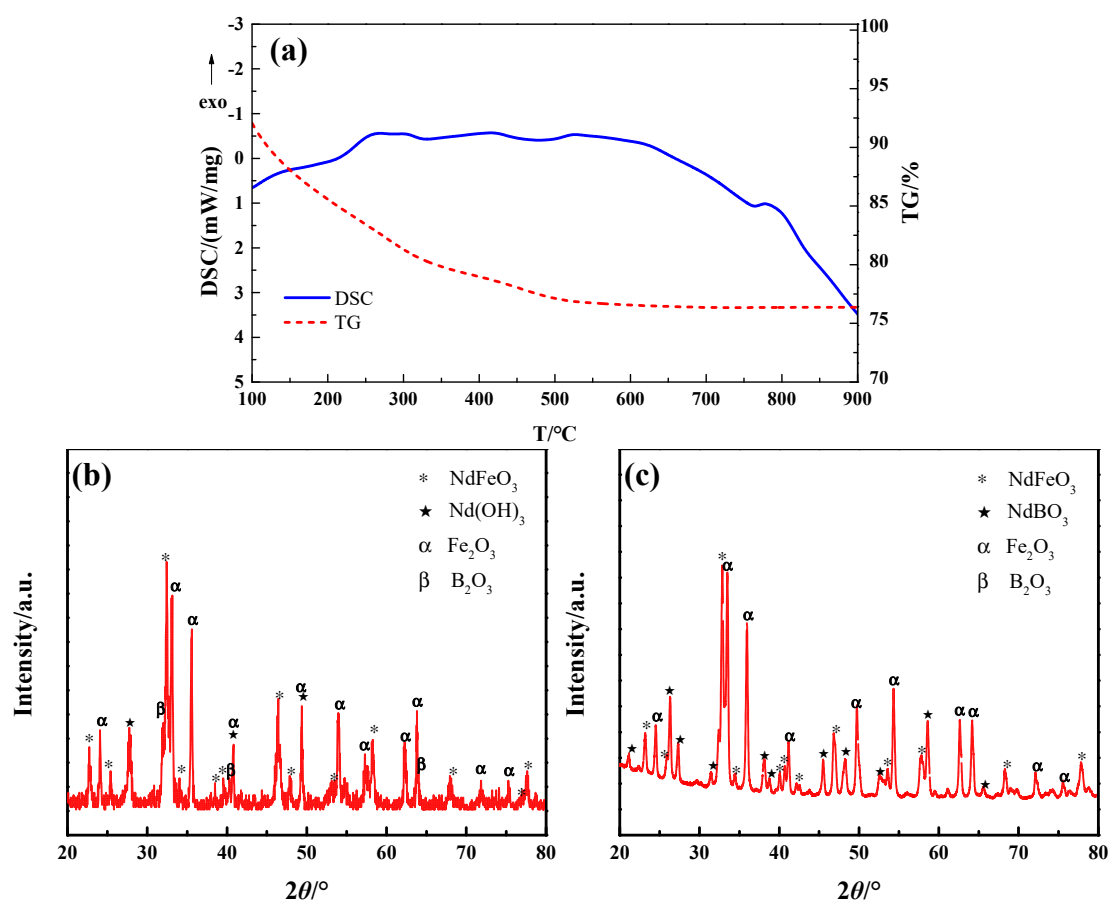

Figure S3 (a) Isochronal DSC of Nd-Fe-B precursor; XRD patterns of Nd-Fe-B precursor heated at temperatures (b) 750°C and (c) 790 °C.

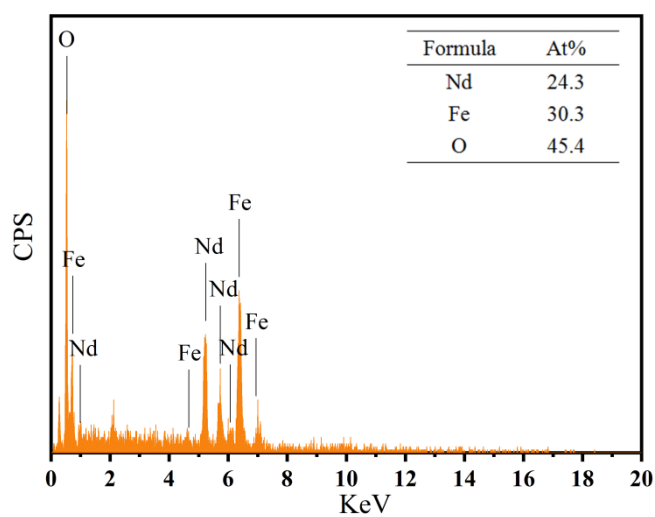

Figure S4. EDS scans of selected points marked #1 in Figure 3.

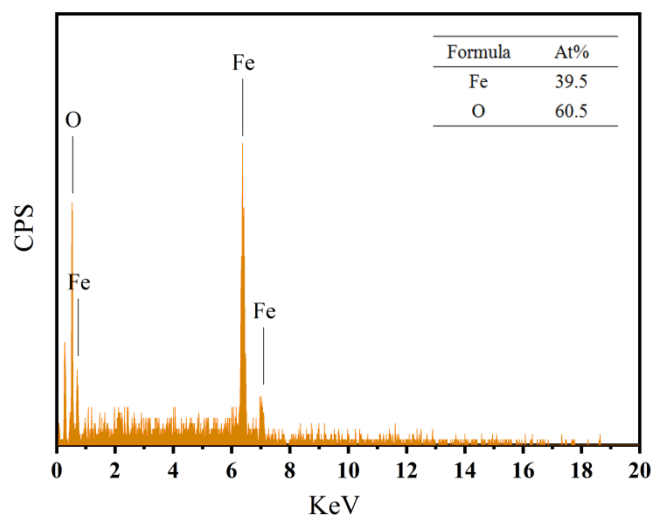

Figure S5. EDS scans of selected points marked #2 in Figure 3.

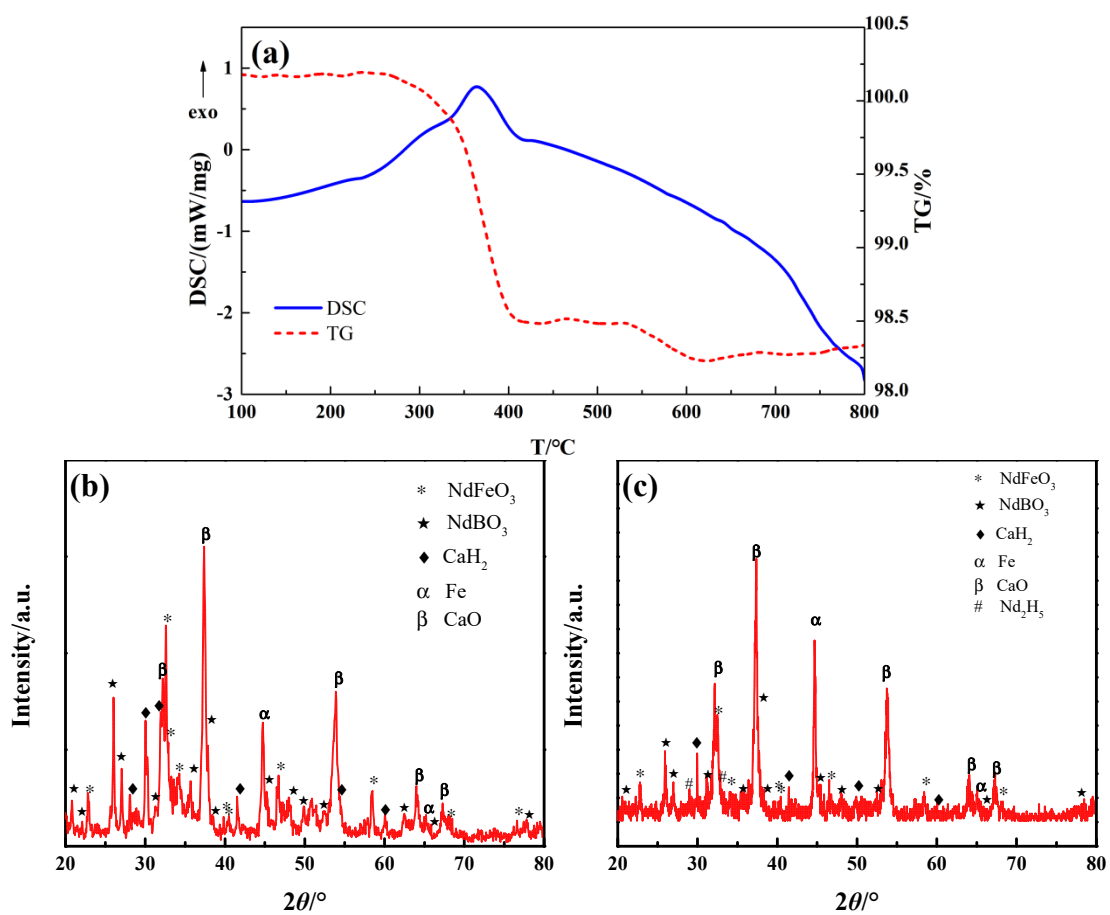

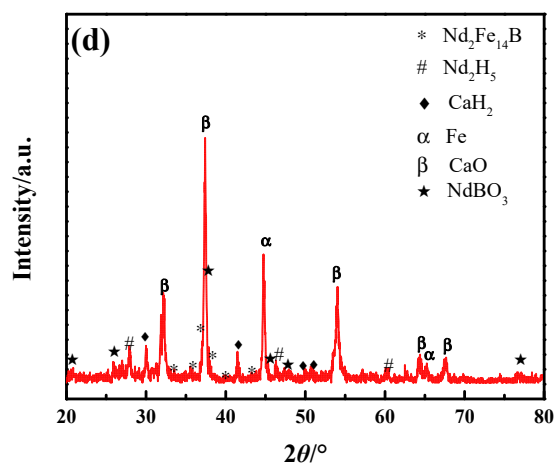

Figure S6 (a) Isochronal DSC of Nd–Fe–B oxide +  $\text{CaH}_2$ ; XRD patterns of Nd–Fe–B oxide +  $\text{CaH}_2$  heated at temperatures (b) 365°C , (c) 425°C and (d) 635 °C.

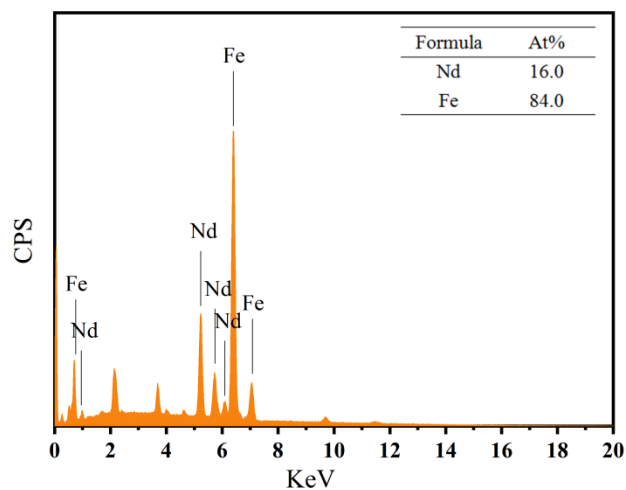

Figure S7. EDS scans of selected points marked #1 in Figure 4.

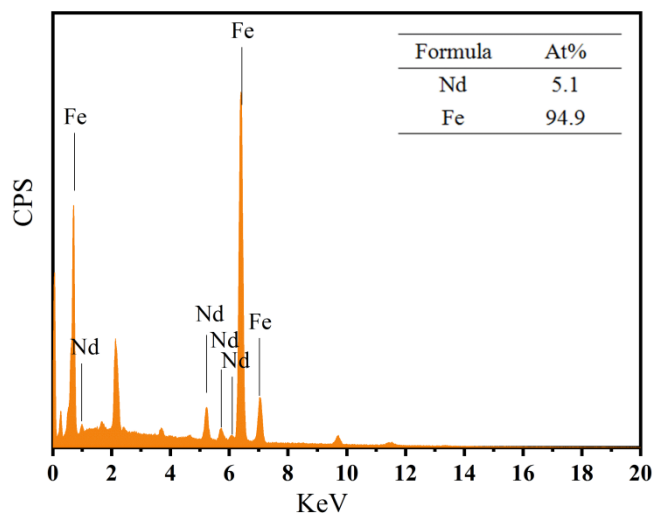

Figure S8. EDS scans of selected points marked #2 in Figure 4.

Table S1 The comparison of preparation of Nd-Fe-B magnetic particles by different chemical methods

| Method              | Composition                             | Ms<br>(emu • g <sup>-1</sup> ) | Mr<br>(emu • g <sup>-1</sup> ) | Hc<br>(kOe) | Particle/Grain<br>size(nm) | Ref.      |
|---------------------|-----------------------------------------|--------------------------------|--------------------------------|-------------|----------------------------|-----------|
| Spray drying        | Nd <sub>2</sub> Fe <sub>14</sub> B      | 148                            | 135                            | 3.9         | -                          | [8]       |
| Auto-combustion     | Nd <sub>2</sub> Fe <sub>14</sub> B      | 80                             | 69                             | 3.3         | 44                         | [13]      |
| Hydrothermal method | Nd <sub>2</sub> Fe <sub>14</sub> B/α-Fe | 107                            | 25                             | 1.2         | ~35                        | [34]      |
| Sol-gel method      | Nd <sub>2</sub> Fe <sub>14</sub> B      | 123                            | -                              | 0.315       | 25                         | [10]      |
|                     | Nd <sub>2</sub> Fe <sub>14</sub> B/α-Fe | 88.83                          | 8.89                           | 0.133       | 50-70                      | [35]      |
|                     | Nd <sub>2</sub> Fe <sub>14</sub> B      | 14.17                          | -                              | 1.02        | -                          | [36]      |
| Microwave-assisted  | Nd <sub>2</sub> Fe <sub>14</sub> B/α-Fe | 75.6                           | 36.7                           | 2.3         | 35                         | This work |
| Hydrothermal method |                                         |                                |                                |             |                            |           |
